# Supplementary material for: Circ_MDM2_000139, Circ_ATF2_001418, Circ_CDC25C_002079, and Circ_BIRC6_001271 Are Involved in the Functions of XAV939 in Non-Small Cell Lung Cancer
Source: Hindawi journal article supplement (doi:10.1155/2019/9107806), 2019-11-27
Supplement: f1 [file 9107806.f1.pdf]

Supplementary Table 1 The primer sequences of key DE-circRNAs

| primer               | primer sequences (5'-3') |
|----------------------|--------------------------|
| circ_MDM2_000139-F   | GAAGGGCAAGAGAGGTGGATCT   |
| circ_MDM2_000139-R   | CTTGGTCCTCGAGGCACTCAC    |
| circ_ATF2_001418-F   | GAACCCACATGCCTCTACCAA    |
| circ_ATF2_001418-R   | ATAGCCACTGACACGGGAACT    |
| circ_DICER1_000834-F | GCTGGGTGTAGTGGTATGTGCT   |
| circ_DICER1_000834-R | CCAGATCATCTCGGGCTCCTG    |
| circ_PRKAA1_001969-F | CTGGAAGGACAACCGCACTG     |
| circ_PRKAA1_001969-R | TGGACGAATAGGTGGTGAAACC   |

|                      |                          |
|----------------------|--------------------------|
| circ_RIPK1_001778-F  | AATTCTCCGGCAGCTTACCC     |
| circ_RIPK1_001778-R  | GACAATCTGTGCCTGCTACGA    |
| circ_CDC25C_002079-F | GCTGGTGACAATGCAGAATGCA   |
| circ_CDC25C_002079-R | GGAACAGCCCCAGTTTCAATCAC  |
| GAPDH-hF             | TGACAACTTTGGTATCGTGGAAGG |
| GAPDH-hR             | AGGCAGGGATGATGTTCTGGAGAG |
